# Supplementary material for: A Phase II Study to Compare the Safety and Efficacy of Direct Oral Anticoagulants versus Subcutaneous Dalteparin for Cancer-Associated Venous Thromboembolism in Patients with Advanced Upper Gastrointestinal, Hepatobiliary and Pancreatic Cancer: PRIORITY
Source: MDPI journal article supplement (doi:10.3390/cancers14030559), 2022-01-22
Supplement: s1 [file s1]

# A Phase II Study to Compare the Safety and Efficacy of Direct Oral Anticoagulants versus Subcutaneous Dalteparin for Cancer-Associated Venous Thromboembolism in Patients with Advanced Upper Gastrointestinal, Hepatobiliary and Pancreatic Cancer: PRIORITY

## Supplementary material

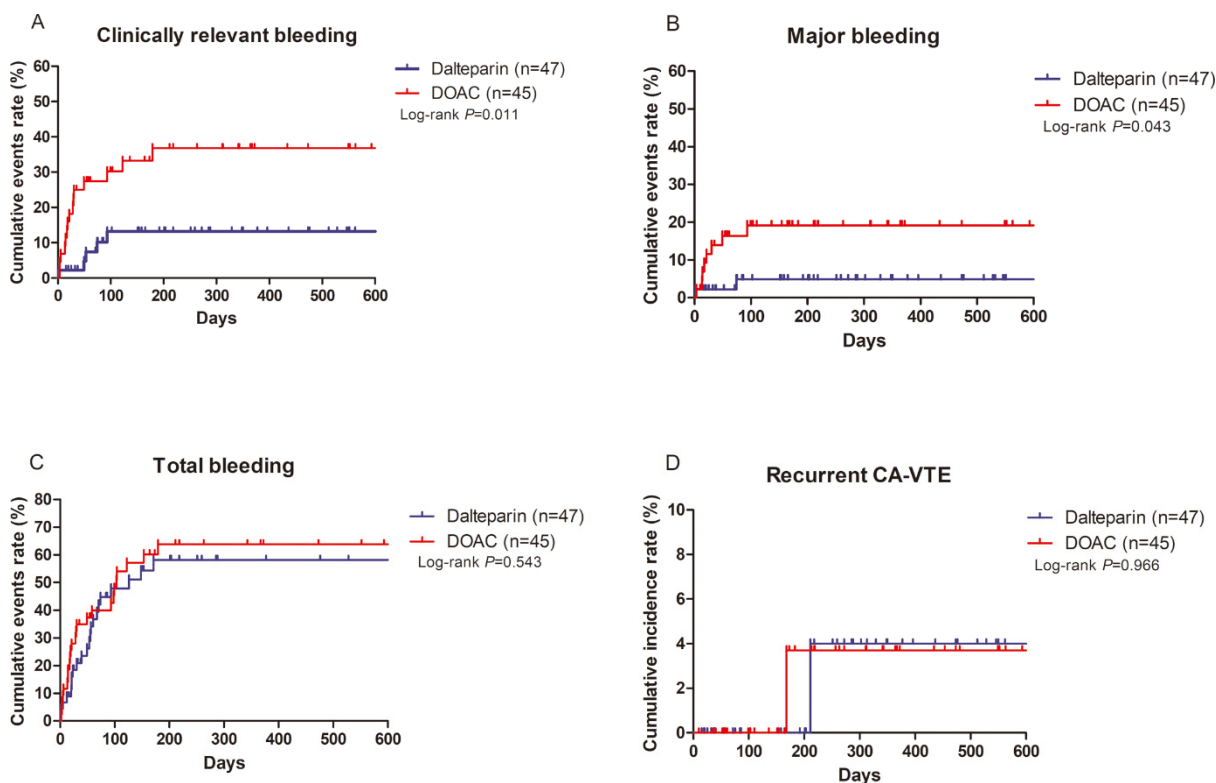

**Figure S1.** The Kaplan-Meier curves of the time to (A) clinically relevant bleeding (major and non-major bleeding), (B) major bleeding, (C) total bleeding events, and (D) recurrent cancer-associated venous thromboembolism in the intent-to-treat set.

**Table S1.** Definition of recurrence of venous thromboembolism and bleeding.

| Recurrence of venous thromboembolism                                                                                                                                                                                                                                                                                                                                                                                                                                                                                                                                                                                                                                                                                                                                                                                  | Major bleeding                                                                                                                                                                                                                                                                         | Clinically relevant non-major bleeding                                                                                                                                                                                                                        | Total bleeding                                   |
|-----------------------------------------------------------------------------------------------------------------------------------------------------------------------------------------------------------------------------------------------------------------------------------------------------------------------------------------------------------------------------------------------------------------------------------------------------------------------------------------------------------------------------------------------------------------------------------------------------------------------------------------------------------------------------------------------------------------------------------------------------------------------------------------------------------------------|----------------------------------------------------------------------------------------------------------------------------------------------------------------------------------------------------------------------------------------------------------------------------------------|---------------------------------------------------------------------------------------------------------------------------------------------------------------------------------------------------------------------------------------------------------------|--------------------------------------------------|
| One of the follows: (1) new intraluminal filling defects of venous segment in two or more views on computed tomography (CT); (2) new noncompressible venous segments on ultrasonography; (3) a substantial increase ( $\geq 4$ mm) in the diameter of the thrombus during full compression in a previously abnormal segment on ultrasonography; (4) new perfusion defect of at least 75% of a segment with corresponding normal ventilation (high probability) on perfusion scan, or (5) new lesions correlated with deep vein thrombosis documented by CT or ultrasonography, despite non-high-probability perfusion defect on perfusion scan; (6) fatal pulmonary embolism based on objective diagnostic tests, which could not be attributed to a documented cause and could not be ruled out (unexplained death). | Acute, clinically overt bleeding accompanied by one or more of the following: contribution to death, occurrence in critical sites such as intracranial site, a decrease in the hemoglobin level of $\geq 2$ g/dL, or the need for the transfusion of $\geq 2$ units of red blood cells | Acute, clinically overt bleeding which did not fulfil the criteria for major bleeding; the need for medical intervention, unscheduled contact with a physician, interruption or discontinuation of anticoagulation, or impairment of activities of daily life | All reported bleeding regardless of the severity |

**Table S2.** Recurrent cancer-associated venous thromboembolism and bleeding events between the rivaroxaban, apixaban, and dalteparin groups.

|                                        | Rivaroxaban<br>(n = 31, %) | Apixaban<br>(n = 13, %) | Dalteparin<br>(n = 46, %) | P* (+/‡/¶)        | HR (95% CI)       | P**   | HR (95% CI)       | P***  | HR (95% CI)      | P**** |
|----------------------------------------|----------------------------|-------------------------|---------------------------|-------------------|-------------------|-------|-------------------|-------|------------------|-------|
| Recurrent CA-VTE                       | 1 (3.2)                    | 0 (0)                   | 1 (2.2)                   | 1.000/1.000/1.000 | 1.56 (0.10-24.93) | 0.754 | 0.03 (0.0-NA)     | 0.744 | 0.03 (0.0-NA)    | 0.681 |
| Category of bleeding events            |                            |                         |                           |                   |                   |       |                   |       |                  |       |
| Major bleeding                         | 5 (16.1)                   | 3 (23.1)                | 2 (4.3)                   | 0.078/0.066/0.676 | 3.89 (0.76-20.08) | 0.104 | 5.28 (0.88-31.64) | 0.068 | 1.31 (0.31-5.49) | 0.710 |
| Clinically relevant non-major bleeding | 5 (16.1)                   | 3 (23.1)                | 4 (8.7)                   | 0.472/0.173/0.676 | 1.84 (0.50-6.86)  | 0.363 | 2.80 (0.63-12.51) | 0.178 | 1.51 (0.36-6.31) | 0.575 |
| Clinically relevant bleeding           | 9 (29.0)                   | 6 (46.2)                | 6 (13.0)                  | 0.082/0.009/0.313 | 2.37 (0.84-6.66)  | 0.102 | 3.93 (1.27-12.22) | 0.018 | 1.58 (0.56-4.44) | 0.386 |
| Total bleeding                         | 19 (61.3)                  | 7 (53.8)                | 23 (50.0)                 | 0.360/1.000/0.742 | 1.25 (0.68-2.30)  | 0.467 | 1.05 (0.45-2.45)  | 0.911 | 0.79 (0.33-1.89) | 0.597 |

Abbreviation: CA-VTE, cancer-associated venous thromboembolism; HR, hazard ratio; CI, confidence interval. \*+ P values were estimated using the Chi-square or Fisher's exact test between rivaroxaban and dalteparin. \*‡ P values were estimated using the Chi-square or Fisher's exact test between apixaban and dalteparin. \*¶ P values were estimated using the Chi-square or Fisher's exact test between rivaroxaban and apixaban. \*\* P values for HR were estimated using the Cox proportional regression model in rivaroxaban compared to dalteparin. \*\*\* P values for HR were estimated using the Cox proportional regression model in apixaban compared to dalteparin. \*\*\*\* P values for HR were estimated using the Cox proportional regression model in apixaban compared to rivaroxaban.

**Table S3.** Characteristics of cancer involvement at gastrointestinal mucosa.

|                                      | <i>n</i> = 38 |
|--------------------------------------|---------------|
| Specific sites                       |               |
| Esophagus                            |               |
| Upper                                | 0             |
| Middle                               | 4             |
| Lower                                | 3             |
| Esophagogastric junction             | 0             |
| Stomach                              |               |
| Cardia                               | 1             |
| Body                                 | 9             |
| Antrum                               | 11            |
| Duodenum                             | 7             |
| Ampulla of Vater                     | 2             |
| Colon                                | 1             |
| Endoscopic finding                   |               |
| Cancer associated mucosal ulceration | 25            |
| Cancer stenosis                      | 5             |
| Invasion on adjacent mucosa          | 8             |
| Endoscopic intervention              |               |
| Esophageal stent insertion           | 1             |
| Gastric stent insertion              | 3             |

**Table S4.** Baseline characteristics in the intent-to-treat set.

|                                               | DOAC (n=45) | Dalteparin (n = 47) | P     |
|-----------------------------------------------|-------------|---------------------|-------|
| Median age, years (range)                     | 63 (39–77)  | 62 (42–78)          | 0.542 |
| Sex                                           |             |                     | 0.824 |
| Male                                          | 25 (55.6)   | 24 (51.1)           |       |
| Female                                        | 20 (44.4)   | 23 (48.9)           |       |
| BMI                                           | 22.6 ± 3.3  | 22.4 ± 3.1          | 0.838 |
| CA-VTE                                        |             |                     | 0.293 |
| Deep vein thromboembolism                     | 5 (11.1)    | 11 (23.4)           |       |
| Pulmonary thromboembolism                     | 35 (77.8)   | 32 (68.1)           |       |
| Both                                          | 5 (11.1)    | 4 (8.5)             |       |
| Tumor types                                   |             |                     | 0.517 |
| Esophageal cancer                             | 7 (15.6)    | 6 (12.8)            |       |
| Gastric cancer                                | 21 (46.6)   | 18 (38.3)           |       |
| Ampulla of Vater cancer                       | 1 (2.2)     | 1 (2.1)             |       |
| Duodenal cancer                               | 0 (0.0)     | 1 (2.1)             |       |
| Hepatocellular carcinoma                      | 2 (4.4)     | 0 (0.0)             |       |
| Biliary cancer                                | 8 (17.8)    | 9 (19.1)            |       |
| Pancreatic cancer                             | 6 (13.3)    | 12 (25.5)           |       |
| ECOG PS                                       |             |                     | 0.661 |
| 0–1                                           | 38 (84.4)   | 37 (78.7)           |       |
| ≥2                                            | 7 (15.6)    | 10 (21.3)           |       |
| Metastatic disease                            | 39 (86.7)   | 34 (72.3)           | 0.090 |
| Chemotherapy during anticoagulation           | 41 (91.1)   | 40 (85.1)           | 0.375 |
| Lines of chemotherapy during anticoagulation* |             |                     | 0.447 |
| First-line                                    | 24 (58.5)   | 28 (70.0)           |       |
| Second-line                                   | 12 (29.3)   | 7 (17.5)            |       |
| Third or later line                           | 5 (12.2)    | 5 (12.5)            |       |
| Radiotherapy during anticoagulation           | 2 (4.4)     | 1 (2.1)             | 0.969 |
| Participating sites                           |             |                     |       |
| Asan Medical Center                           | 36 (80.0)   | 38 (80.9)           |       |
| Other sites                                   | 9 (20.0)    | 9 (19.1)            |       |

Abbreviation: DOAC, direct oral anticoagulant; BMI, body mass index; GI, gastrointestinal; ECOG PS, Eastern Cooperative Oncology Group Performance Status. \*Percentages were calculated among 81 patients treated with chemotherapy during anticoagulation.

**Table S5.** Recurrent cancer-associated venous thromboembolism and bleeding events in intent-to-treat set .

|                                        | DOAC<br>(n = 45, %) | Dalteparin<br>(n = 47, %) | P*    | HR (95% CI)       | P**   | Adjusted HR***<br>(95% CI) | P**   |
|----------------------------------------|---------------------|---------------------------|-------|-------------------|-------|----------------------------|-------|
| Recurrent CA-VTE                       | 1 (2.2)             | 1 (2.1)                   | 1.000 | 1.06 (0.07–16.98) | 0.966 | 0.97 (0.05–19.23)          | 0.985 |
| Category of bleeding events            |                     |                           |       |                   |       |                            |       |
| Major bleeding                         | 8 (17.8)            | 2 (4.3)                   | 0.048 | 4.32 (0.92–20.36) | 0.064 | 4.05 (0.86–19.11)          | 0.077 |
| Clinically relevant non-major bleeding | 8 (17.8)            | 4 (8.5)                   | 0.226 | 2.11 (0.64–7.02)  | 0.222 | 1.66 (0.48–5.71)           | 0.426 |
| Clinically relevant bleeding           | 15 (33.3)           | 6 (12.8)                  | 0.019 | 2.83 (1.10–7.30)  | 0.031 | 2.83 (1.09–7.29)           | 0.031 |
| Total bleeding                         | 26 (57.8)           | 23 (48.9)                 | 0.396 | 1.19 (0.68–2.09)  | 0.545 | 1.12 (0.61–2.04)           | 0.721 |

Abbreviation: CA-VTE, cancer-associated venous thromboembolism; HR, hazard ratio; CI, confidence interval. \* P values were estimated using the chi-squared test or Fisher's exact test. \*\* P values were estimated using the Cox proportional regression model. \*\*\* Hazard ratio was adjusted with age, sex, and cancer involvement at gastrointestinal mucosa.

**Table S6.** Univariate analysis for major bleeding and clinically relevant bleeding in intent-to-treat set.

|                                                                            | Major bleeding        |       | Clinically relevant bleeding |       |
|----------------------------------------------------------------------------|-----------------------|-------|------------------------------|-------|
|                                                                            | HR (95% CI)           | P*    | HR (95% CI)                  | P*    |
| Male vs. Female                                                            | 2.01 (0.52–7.79)      | 0.311 | 1.80 (0.73–4.47)             | 0.203 |
| Age ≥65 years vs. <65 years                                                | 0.28 (0.06–1.30)      | 0.103 | 0.55 (0.22–1.37)             | 0.199 |
| ECOG PS ≥2 vs. ECOG PS 0–1                                                 | 0.56 (0.07–4.44)      | 0.584 | 1.30 (0.44–3.89)             | 0.636 |
| BMI (<18.5) vs. BMI (≥18.5)                                                | 0.90 (0.11–7.20)      | 0.921 | 1.33 (0.39–4.54)             | 0.649 |
| Primary cancer type                                                        |                       | 0.397 |                              | 0.245 |
| Upper GI tract cancer                                                      | 1                     |       | 1                            |       |
| Hepatobiliary and pancreas cancer                                          | 1.71 (0.49–5.94)      |       | 1.67 (0.71–3.94)             |       |
| Hemoglobin <9.0 g/dL vs. ≥9.0 g/dL                                         | 2.21 (0.57–8.55)      | 0.252 | 1.67 (0.61–4.56)             | 0.321 |
| Platelet <100 × 10 <sup>6</sup> /μL vs. ≥100 × 10 <sup>6</sup> /μL         | 2.37 (0.50–11.17)     | 0.275 | 0.94 (0.22–4.02)             | 0.930 |
| Cr clearance <60 mL/min vs. ≥60 mL/min                                     | 1.10 (0.23–5.27)      | 0.910 | 1.04 (0.35–3.11)             | 0.948 |
| Albumin <3.5 g/dL vs. ≥3.5 g/dL                                            | 1.87 (0.48–7.25)      | 0.366 | 1.69 (0.68–4.19)             | 0.261 |
| Activated partial thromboplastin time (aPTT) > 35 seconds vs. ≤ 35 seconds | 1.14 (0.14–9.00)      | 0.901 | 0.51 (0.07–3.84)             | 0.516 |
| Anticancer systemic therapy during anticoagulation (yes vs. no)            | 23.04 (0.0–798399.18) | 0.556 | 23.03 (0.01–36,930.84)       | 0.405 |
| Treatment lines of systemic therapy during anticoagulation                 |                       |       |                              |       |
| First-line                                                                 | 1                     |       | 1                            |       |
| Second-line                                                                | 1.64 (0.39–6.86)      | 0.499 | 2.13 (0.81–5.61)             | 0.127 |
| Third or later line                                                        | 2.45 (0.47–12.68)     | 0.286 | 2.58 (0.80–8.30)             | 0.111 |
| Radiotherapy during anticoagulation (yes vs. no)                           | 4.07 (0.51–32.17)     | 0.184 | 1.66 (0.22–12.37)            | 0.623 |
| Cancer involvement at GI mucosa (yes vs. no)                               | 2.27 (0.64–8.06)      | 0.204 | 2.57 (1.06–6.20)             | 0.036 |
| Type of anticoagulant (DOAC vs. dalteparin)                                | 4.32 (0.92–20.36)     | 0.064 | 2.83 (1.10–7.30)             | 0.031 |

Abbreviation: HR, hazard ratio; CI, confidence interval; ECOG PS, Eastern Cooperative Oncology Group Performance Status; BMI, body mass index; Cr, creatinine; GI, gastrointestinal; DOAC, direct oral anticoagulant .
